# Supplementary material for: Citrate and malonate increase microbial activity and alter microbial community composition in uncontaminated and diesel-contaminated soil microcosms
Source: Copernicus journal article supplement (doi:10.5194/soil-2-487-2016), 2016-09-21
Supplement: Supplementary file 1 [file soil-2-487-2016-supplement.pdf]

Supplement of SOIL, 2, 487–498, 2016  
<http://www.soil-journal.net/2/487/2016/>  
doi:10.5194/soil-2-487-2016-supplement  
© Author(s) 2016. CC Attribution 3.0 License.

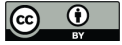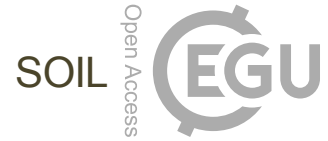

*Supplement of*

## **Citrate and malonate increase microbial activity and alter microbial community composition in uncontaminated and diesel-contaminated soil microcosms**

**Belinda C. Martin et al.**

*Correspondence to:* Belinda C. Martin ([belinda.martin@research.uwa.edu.au](mailto:belinda.martin@research.uwa.edu.au))

The copyright of individual parts of the supplement might differ from the CC-BY 3.0 licence.

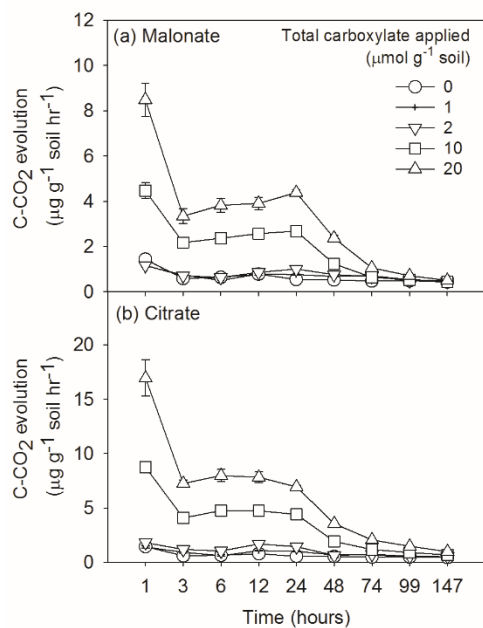

**Fig. S1. Results of a preliminary experiment showing CO<sub>2</sub> evolution over 147 hours following the addition of a) malonate and b) citrate at 0 (water control), 0.25, 0.5, 2.5 and 5  $\mu\text{mol g}^{-1}$  soil into uncontaminated soil every 48 hours for 7 days. Values are means  $\pm$  SE (n = 4). Note that the highest rate of addition was the one used in the main experiment.**

10

15

20

**Table S1. Experimental design**

|                          | Control (sterile deionised water 48 h <sup>-1</sup> ) | Malonate addition ( $\mu\text{mol g}^{-1}$ soil 48 h <sup>-1</sup> ) | Citrate + malonate addition ( $\mu\text{mol g}^{-1}$ soil 48 h <sup>-1</sup> ) | Citrate addition ( $\mu\text{mol g}^{-1}$ soil 48 h <sup>-1</sup> ) |
|--------------------------|-------------------------------------------------------|----------------------------------------------------------------------|--------------------------------------------------------------------------------|---------------------------------------------------------------------|
| Uncontaminated soil      | 500 $\mu\text{L jar}^{-1}$                            | 5                                                                    | 2.5 citrate<br>2.5 malonate                                                    | 5                                                                   |
| Diesel-contaminated soil | 500 $\mu\text{L jar}^{-1}$                            | 5                                                                    | 2.5 citrate<br>2.5 malonate                                                    | 5                                                                   |

**Table S2. The 31 carbon substrates used to determine community level physiological profiles (CLPPs) in the MicroResp assay**

| Substrate class  | Substrate                                                                                                                                                                                                        |
|------------------|------------------------------------------------------------------------------------------------------------------------------------------------------------------------------------------------------------------|
| Amino acids      | L-alanine, L-asparagine, L-glutamic acid, L-methionine, L-threonine, L-valine                                                                                                                                    |
| Aromatics        | Cinnamic, Coumarin, Imidazole, Quercetin, Syringic acid, +catechin                                                                                                                                               |
| Carbohydrates    | D-galactose, Dextrin, L-rhamnose                                                                                                                                                                                 |
| Carboxylic acids | a-ketobutyric acid, a-ketoglutaric acid, Citric acid, D-galacturonic, DL-lactic, DL-malic acid, Formic acid, Fumaric acid, Glycolic, L-ascorbic acid, L-tartaric acid, Quinic acid, Urocanic acid, Succinic acid |
| Sugar alcohols   | D-mannitol                                                                                                                                                                                                       |
| Vitamins         | Thiamine                                                                                                                                                                                                         |
